# Supplementary material
Source: PubMed Central journal article supplement (PMC5371429)
Supplement: NIHMS852788-supplement-6.pdf [file NIHMS852788-supplement-6.pdf]

**Table S2. Summary of crystallographic information (Related to Figures 6 and 7)**

| <b>Structure</b>                                        | <b>DXO 3'-NADP<sup>+</sup>-Ca<sup>2+</sup> complex</b> | <b>SsRai1 3'-NADP<sup>+</sup>-Ca<sup>2+</sup> complex</b> |
|---------------------------------------------------------|--------------------------------------------------------|-----------------------------------------------------------|
| <b>Data Collection</b>                                  |                                                        |                                                           |
| Space group                                             | <i>P2</i> <sub>1</sub>                                 | <i>P2</i> <sub>1</sub>                                    |
| Cell dimensions                                         |                                                        |                                                           |
| a,b,c (Å)                                               | 49.9, 87.7, 53.2                                       | 89.4, 102.5, 101.2                                        |
| α,β,γ (°)                                               | 90, 113.0, 90                                          | 90, 112.8, 90                                             |
| Resolution (Å) <sup>1</sup>                             | 48.9-2.1 (2.2-2.1)                                     | 49.7-1.9 (1.96-1.9)                                       |
| <i>R</i> <sub>merge</sub> (%)                           | 7.2 (39.6)                                             | 8.3 (48.3)                                                |
| <i>I</i> /σ                                             | 12.1 (2.8)                                             | 14.2 (2.0)                                                |
| Completeness (%)                                        | 99.5 (98.2)                                            | 99.6 (97.9)                                               |
| No. of reflections                                      | 26169                                                  | 69282                                                     |
| Redundancy                                              | 2.9 (2.8)                                              | 3.6 (3.0)                                                 |
| <b>Refinement</b>                                       |                                                        |                                                           |
| Resolution (Å)                                          | 48.9-2.1                                               | 49.7-1.9                                                  |
| <i>R</i> <sub>work</sub> / <i>R</i> <sub>free</sub> (%) | 16.1 (23.1) / 20.8 (26.5)                              | 20.8 (26.9) / 25.4 (31.4)                                 |
| Number of atoms                                         | 3142                                                   | 13483                                                     |
| Protein                                                 | 2941                                                   | 12529                                                     |
| Ligand/Ion                                              | 49                                                     | 96                                                        |
| Water                                                   | 151                                                    | 858                                                       |
| B-factors (Å <sup>2</sup> )                             | 30.6                                                   | 29.7                                                      |
| Protein                                                 | 30.0                                                   | 29.4                                                      |
| Ligand                                                  | 52.3                                                   | 36.8                                                      |
| Water                                                   | 34.9                                                   | 33.6                                                      |
| r.m.s.d.                                                |                                                        |                                                           |
| Bond lengths (Å)                                        | 0.013                                                  | 0.003                                                     |
| Bond angles (°)                                         | 1.4                                                    | 0.69                                                      |

1. The numbers in parentheses are for the highest resolution shell.

**Table S3. DNA Primer Sequences (Related to the STAR Methods section):**

ϕ2.5A-CA2: 5'-  
CAGTAATACGACTCACTATTAGGCCTCTCGCTCTGCTGGGTGTGCGCTTGCTTGGCTTGCTT  
GTGGTCTGCGGTTTCGTTCCCGCTTTGGT -3'

NAD-Transcription Forward Primer: 5'-CAGTAATACGACTCACTATTAGGCC-3'  
NAD-Transcription Reverse Primer: 5'-CCCCCCCCCCCCCCCCACCAAAGCGGGAACGAACC-3'

ϕ2.5-Luc Forward Primer: 5'-ggtaccCAGTAATACGACTCACTATTAGGCC-3'  
ϕ2.5-Luc Reverse Primer: 5'-ctcgagACCAAAGCGGGAACGAACC-3'

F-Luc Forward Primer: 5'-CAGTAATACGACTCACTATTAGGCC-3'  
F-Luc-A<sub>60</sub> Reverse Primer: 5'-T<sub>60</sub>ACCTACTCAGACAATGCGATGC-3'

R-Luc Forward Primer: 5'-TAATACGACTCACTATAGGG-3'  
R-Luc-A<sub>60</sub> Reverse Primer: 5'-T<sub>60</sub>GTACGACACTCATACTAACGCC-3'

F-Luc RT Primer: 5'-CGAAGATGTTGGGGTGTGG-3'

F-Luc P1: 5'-CGAAATGTCCGTTTCGGTTGG-3'  
F-Luc P2: 5'-CGAAATGCCCATACTGTTGAGC-3'

GAPDH P1: 5'-AGGTGAAGGTCCGAGTCAAC-3'  
GAPDH P2: 5'-TTCTCAGCCTTGACGGTGC-3'

DXO-gRNA1: 5' CACCGACAGCCCCCAACCTGCTATG3'  
DXO-gRNA2: 5' AAACCATAGCAGGTTGGGGGCTGTC3'

TMSB10 P1: 5' ACCAGACATGGGGGAAATCG-3'  
TMSB10 P2: 5' CACATCACGACTGGGGTCTC-3'

CKS2 P1: 5'-TCTCGTTTCATTTTCTGCAGCG-3'  
CKS2 P2: 5'-GTTGGACACCAAGTCTCCTCC-3'

COX7B P1: 5'-TGCCGCAGTTCTAGCTTCAC-3'  
COX7B P2: 5'-AGGTGTACGTTTCTGGTGGC-3'

LSM3 P1: 5'-TCCGGAGATTGACGTTGCTC-3'  
LSM3 P2: 5'-GTCCGCCATGTTTCAAACCC-3'  
LSM3 P3: 5'- ATGACCGAGAGCTTCGAGG -3'  
LSM3 P4: 5'- CCCGGACAAAGAGCATTGG -3'

NDUFS5 P1: 5'-AAGATGGCTGGTCGATGCC-3'  
NDUFS5 P2: 5'-TGATGGTACCTGCACGTCTC-3'

TIMP1 P1: 5'-CTTCTGGCATCCTGTTGTTGC-3'  
TIMP1 P2: 5'-GGTTGACTTCTGGTGTCCCC-3'

EXOSC2 P1: 5'-TGCCGGGGGATAACAATCAC-3'  
EXOSC2 P2: 5'-TCTGTGATTTCGTCCCCTACG-3'

ID2 P1: 5'-CTATTGTCAGCCTGCATCACC-3'  
ID2 P2: 5'-TATCCGTGTTGAGGGTGGTC-3'

RHOA P1: 5'-CATTTCTGTCCCAACGTGCC-3'  
RHOA P2: 5'-GCCTTCTTCAGGTTTCACCG-3'

VIM P1: 5'-TGGACCAGCTAACCAACGAC-3'  
VIM P2: 5'-AAGGTCAAGACGTGCCAGAG-3'

MRPL33 P1: 5'-ACCAAGAGAAACCGACTGCG-3'  
MRPL33 P2: 5'-TCAGTATCCCCGCCCTCAG-3'

MRPL13 P1: 5'-ACCTGTGTACCATGCACTGAG-3'  
MRPL13 P2: 5'-CAATTGCCACTGGATCCCTC-3'

SNORA49 P1: 5'-CTTCCTCAGCCTTACTCCAGG-3'  
SNORA49 P2: 5'-TGTCAGCTCAACTTGTAGGCC-3'

SNORA76 P1: 5'-GCGCTGTCTTTGAGCCC-3'  
SNORA76 P2: 5'-GGCGGCCCCAGTTATGC-3')

SNORA20 P1: 5'-GCTGCTTGTAGTCTCACAGTG-3'  
SNORA20 P2: 5'-ATGTCTAGTCCCTGCAGAAGAG-3'  
SNORA20 P3: 5'-CCTTAAGTCCTGCCTACACAGG-3'

SNORA7B P1: 5'-GACCTCCTGGGATCGCATC-3'  
SNORA7B P2: 5'-ACTGTCGCAGAGTGTCTTCC-3'

SCARNA7 P1: 5'-GTGTGCTTGTGGTGGCTATG-3'  
SCARNA7 P2: 5'-CCAGGCTAGTTAGGTGAGCTG-3'

SNORD17 P1: 5'-TGACCTTCTTCCAAGCCTCAG-3'  
SNORD17 P2: 5'-ATTCTTACCGGTAGCCTGCC-3'

SCARNA5 P1: 5'-TTGCACTGAATGTCACGGTC-3'  
SCARNA5 P2: 5'-ATACTCGTCAGCTGTGAGCC-3'

SNORA6 P1: 5'-TCTGAGTGTCGGAAGTGTGC-3'  
SNORA6 P2: 5'-ACTCCAGTCATAGAGGCAAGC-3'

SCARNA10 P1: 5'-AGGGGTGATTCTTCCAGTTGC-3'  
SCARNA10 P2: 5'-AAGTCCTTTAGGACCCTTGGC-3'

SNORA46 P1: 5'-ATTCCCCATTCTTGGTTACGC-3'  
SNORA46 P2: 5'-ATACAGCAACAGCAGAATGGC-3'

SNORA11B P1: 5'-CTCCTCTGTTTACAACACACCC-3'  
SNORA11B P2: 5'-TTGTAGGGAGGTCACAAGCTC-3'

18S rRNA P1 : 5' -TTCGATGGTAGTCGCCGTG- 3'  
18S rRNA P2 : 5' -GCTGCCTTCCTTGGATGTG- 3'

Anchor-d(T)<sub>18</sub>: 5'-CTGCAGGTCGACCATATGGGTTTTTTTTTTTTTTTTTTT-3'  
Anchor Primer: 5'-CTGCAGGTCGACCATATGGG-3'
